# Supplementary material for: Development, validity, and reliability of a food frequency questionnaire for antioxidants in elderly Iranian people
Source: PubMed Central journal article supplement — J Res Med Sci. 2016 Mar 15;21:14. doi: 10.4103/1735-1995.178753 (PMC5122246; doi:10.4103/1735-1995.178753), 2016-03-15
Supplement: JRMS-21-14_Suppl1.pdf [file JRMS-21-14_Suppl1.pdf]

**In the name of God****Annual food frequency questionnaire for antioxidants in elderly residents in Isfahan**

Tehran University of Medical Science

Department of Nutrition

Name: Last name: File number: Age: Date:

| Row | Food                                 | Measure                          | Day | Week | Month | Year | Description |
|-----|--------------------------------------|----------------------------------|-----|------|-------|------|-------------|
| 1   | Wheat bread (taftun and lavash)      | One piece (10×10 cm)             |     |      |       |      |             |
| 2   | Whole wheat bread (sangak)           | One piece (10×10 cm)             |     |      |       |      |             |
| 3   | Oat bread                            | One piece (10×10 cm)             |     |      |       |      |             |
| 4   | Wheat bread (sandwich and snack)     | One medium piece (30 cm)         |     |      |       |      |             |
| 5   | Cooked rice                          | One normal spatula               |     |      |       |      |             |
| 6   | Grout (wheat and out)                | One glass (raw)                  |     |      |       |      |             |
| 7   | Boiled potatoes                      | One medium                       |     |      |       |      |             |
| 8   | Fries                                | One medium                       |     |      |       |      |             |
| 9   | Corn                                 | One cup (cooked)                 |     |      |       |      |             |
| 10  | Lentil and mash                      | One cup (raw)                    |     |      |       |      |             |
| 11  | Beans                                | One cup (raw)                    |     |      |       |      |             |
| 12  | Peas and cotyledon                   | One cup (raw)                    |     |      |       |      |             |
| 13  | Broad bean                           | One cup (raw)                    |     |      |       |      |             |
| 14  | Soya                                 | One cup (raw)                    |     |      |       |      |             |
| 15  | Bean sprouts                         | One cup (raw)                    |     |      |       |      |             |
| 16  | Milk and yogurt                      | One glass                        |     |      |       |      |             |
| 17  | Dough                                | One glass                        |     |      |       |      |             |
| 18  | Cheese                               | One piece (30 g)                 |     |      |       |      |             |
| 19  | Meats                                | One piece (30 g)                 |     |      |       |      |             |
| 20  | Chicken                              | One piece (30 g)                 |     |      |       |      |             |
| 21  | Fish                                 | One piece (30 g)                 |     |      |       |      |             |
| 22  | Lettuce                              | One glass (raw and scrappy)      |     |      |       |      |             |
| 23  | Raw tomatoes                         | One medium                       |     |      |       |      |             |
| 24  | Cooked tomatoes                      | One medium                       |     |      |       |      |             |
| 25  | Cucumber                             | One medium                       |     |      |       |      |             |
| 26  | Mushrooms                            | One glass (scrappy)              |     |      |       |      |             |
| 27  | Fresh herbs                          | One saucer                       |     |      |       |      |             |
| 28  | Cooked vegetables                    | One glass                        |     |      |       |      |             |
| 29  | Stewed pumpkin and eggplant          | One medium (cooked)              |     |      |       |      |             |
| 30  | Green beans and Green peas           | One cup (cooked)                 |     |      |       |      |             |
| 31  | Okra                                 | One cup (cooked)                 |     |      |       |      |             |
| 32  | Raw carrots                          | One medium                       |     |      |       |      |             |
| 33  | Cooked carrots                       | One medium                       |     |      |       |      |             |
| 34  | Garlic and onions                    | One cup (scrappy)                |     |      |       |      |             |
| 35  | Cabbage (red, white, kale, broccoli) | One small bowl (scrappy and raw) |     |      |       |      |             |
| 36  | Raw pepper                           | One medium                       |     |      |       |      |             |
| 37  | Cooked pepper                        | One medium                       |     |      |       |      |             |
| 38  | Narrow green peppers                 | One medium                       |     |      |       |      |             |
| 39  | Olive                                | One medium                       |     |      |       |      |             |
| 40  | Cantaloupe                           | One glass (scrappy)              |     |      |       |      |             |
| 41  | Melon                                | One glass (scrappy)              |     |      |       |      |             |
| 42  | Watermelon                           | One glass (scrappy)              |     |      |       |      |             |
| 43  | Apricot                              | One medium                       |     |      |       |      |             |
| 44  | Sour cherry                          | One glass                        |     |      |       |      |             |
| 45  | Strawberries                         | One medium                       |     |      |       |      |             |
| 46  | Pears                                | One medium                       |     |      |       |      |             |
| 47  | Quince                               | One medium                       |     |      |       |      |             |
| 48  | Apple varieties                      | One medium                       |     |      |       |      |             |
| 49  | Peaches and nectarines               | One medium                       |     |      |       |      |             |

Continued

| Row | Food                       | Measure            | Day | Week | Month | Year | Description          |
|-----|----------------------------|--------------------|-----|------|-------|------|----------------------|
| 50  | Prunus                     | One medium         |     |      |       |      |                      |
| 51  | Fresh figs                 | One medium         |     |      |       |      |                      |
| 52  | Dried figs                 | One medium         |     |      |       |      |                      |
| 53  | Grapes (green and red)     | One glass          |     |      |       |      |                      |
| 54  | Kiwi                       | One medium         |     |      |       |      |                      |
| 55  | Grape fruit and chino      | One medium         |     |      |       |      |                      |
| 56  | Orange                     | One medium         |     |      |       |      |                      |
| 57  | Tangerine                  | One medium         |     |      |       |      |                      |
| 58  | Lemon and sour orange      | One medium         |     |      |       |      |                      |
| 59  | Persimmon                  | One medium         |     |      |       |      |                      |
| 60  | Pomegranate                | One medium         |     |      |       |      |                      |
| 61  | Date                       | One medium         |     |      |       |      |                      |
| 62  | Yellow and red plums       | One medium         |     |      |       |      |                      |
| 63  | Plum brandy                | One medium         |     |      |       |      |                      |
| 64  | Banana                     | One medium         |     |      |       |      |                      |
| 65  | Pineapple                  | One glass          |     |      |       |      |                      |
| 66  | Mango                      | One medium         |     |      |       |      |                      |
| 67  | Fresh berries              | One glass          |     |      |       |      |                      |
| 68  | Barberry                   | A Quarter of glass |     |      |       |      |                      |
| 69  | Seabuckthorn and jujube    | One glass          |     |      |       |      |                      |
| 70  | Natural orange juice       | One glass          |     |      |       |      |                      |
| 71  | Natural apple juice        | One glass          |     |      |       |      |                      |
| 72  | Raisins and currant        | One tablespoon     |     |      |       |      |                      |
| 73  | Dried peaches and apricots | One medium         |     |      |       |      |                      |
| 74  | Fruit compote              | One medium can     |     |      |       |      |                      |
| 75  | Juice package              | One medium         |     |      |       |      |                      |
| 76  | Oil                        | One tablespoon     |     |      |       |      | Type:                |
| 77  | Olive oil                  | One tablespoon     |     |      |       |      |                      |
| 78  | Peanuts                    | One medium         |     |      |       |      |                      |
| 79  | Almonds                    | One medium         |     |      |       |      |                      |
| 80  | Walnuts                    | One medium         |     |      |       |      |                      |
| 81  | Pistachios                 | 10 medium pieces   |     |      |       |      |                      |
| 82  | Hazelnut                   | 10 medium pieces   |     |      |       |      |                      |
| 83  | Pumpkin seeds              | One tablespoon     |     |      |       |      |                      |
| 84  | Sunflower seeds            | One tablespoon     |     |      |       |      |                      |
| 85  | Sesame and its pudding     | One tablespoon     |     |      |       |      |                      |
| 86  | Hindi almond               | One medium         |     |      |       |      |                      |
| 87  | Chocolate                  | One medium         |     |      |       |      | Type (sweet or sour) |
| 88  | Tea                        | One glass          |     |      |       |      |                      |
| 89  | Coffee                     | One cup            |     |      |       |      |                      |
